# Supplementary material for: Scaffold Pore Curvature Influences ΜSC Fate through Differential Cellular Organization and YAP/TAZ Activity
Source: MDPI journal article supplement (doi:10.3390/ijms23094499), 2022-04-19
Supplement: s1 [file s1]

**Table S1.** Primers for qPCR gene expression analysis.

| GENE          | FORWARD                  | REVERSE                 |
|---------------|--------------------------|-------------------------|
| <b>CD44</b>   | GTGGCACACAGCTTGGGGA      | TCAGAGCCAGTGCCAGGAGAGAT |
| <b>COL1A1</b> | GCTCCTCTTAGGGGCCACT      | CCACGTCTCACCATTGGGG     |
| <b>RUNX2</b>  | TGGCCGGGAATGATGAGAAC     | TGAAACTCTTGCCTCGTCCG    |
| <b>SP7</b>    | GGGCGTTCTACCTGCGACTG     | ATCGGGGCGGCTGATTG       |
| <b>GAPDH</b>  | CGTCCCGTAGACAAAATGGT     | TTGATGGCAACAATCTCCAC    |
| <b>CTGF</b>   | GGCCTCTTCTGCGATTTCTG     | GCAGCTTGACCCTTCTCGG     |
| <b>YAP1</b>   | ACCCTCGTTTTGCCATGAAC     | TGTGCTGGGATTGATATTCCGTA |
| <b>AREG</b>   | GGTCTTAGGCTCAGGCCATTA    | CGCTTATGGTGGAACCTCTC    |
| <b>VCL</b>    | TCTCGCACCTGGTGATTATGC    | TGAACAGTCTCTTTTCCAACCC  |
| <b>ZYX</b>    | CCGATGATCGAGGAACCATTC    | CGTTCTTGGTCATGTCGTCCA   |
| <b>TLN1</b>   | TACTACATGCTCCGAAATGGGG   | CACCGTTCCGTCTAACATCCG   |
| <b>TLN2</b>   | GCCACTGCAATGTGGTGAAG     | TCTCCCTAATGACTCGACAAGC  |
| <b>RHOA</b>   | GAAACTGGTGATTGTTGGTGATG  | ACCGTGGGCACATAGACCT     |
| <b>GPRCA5</b> | ACCACAGACTTTGTGACCTGG    | CGAGTGCAAACATGCAAGCC    |
| <b>MCAM</b>   | CCCAAAGTGGTGTCGTCTT      | GGAAAATCAGTATCTGCCTCTCC |
| <b>KDNL2</b>  | TGGACGGGATAAGGATGCCA     | TGACATCGAGTTTTTCCACCAAC |
| <b>LMNA</b>   | GGATGCTGAGAACAGGCTACA    | GCTTGGCGGAGTATGTCTTTT   |
| <b>NCAD</b>   | AGGCTTCTGGTGAAATTGCAT    | GTCCACCTTGAAATCTGCTGG   |
| <b>CX45</b>   | AGATCCACAACCATTTCGACATTT | TCCCAGGTACATCACAGAGGG   |
| <b>NESTIN</b> | CCCTGAAGTCGAGGAGCTG      | CTGCTGCACCTCTAAGCGA     |
| <b>CX23</b>   | GAAGGATGTGTTAAGCCTCCAA   | CTCATTCCCGTAGACAGCAAAG  |

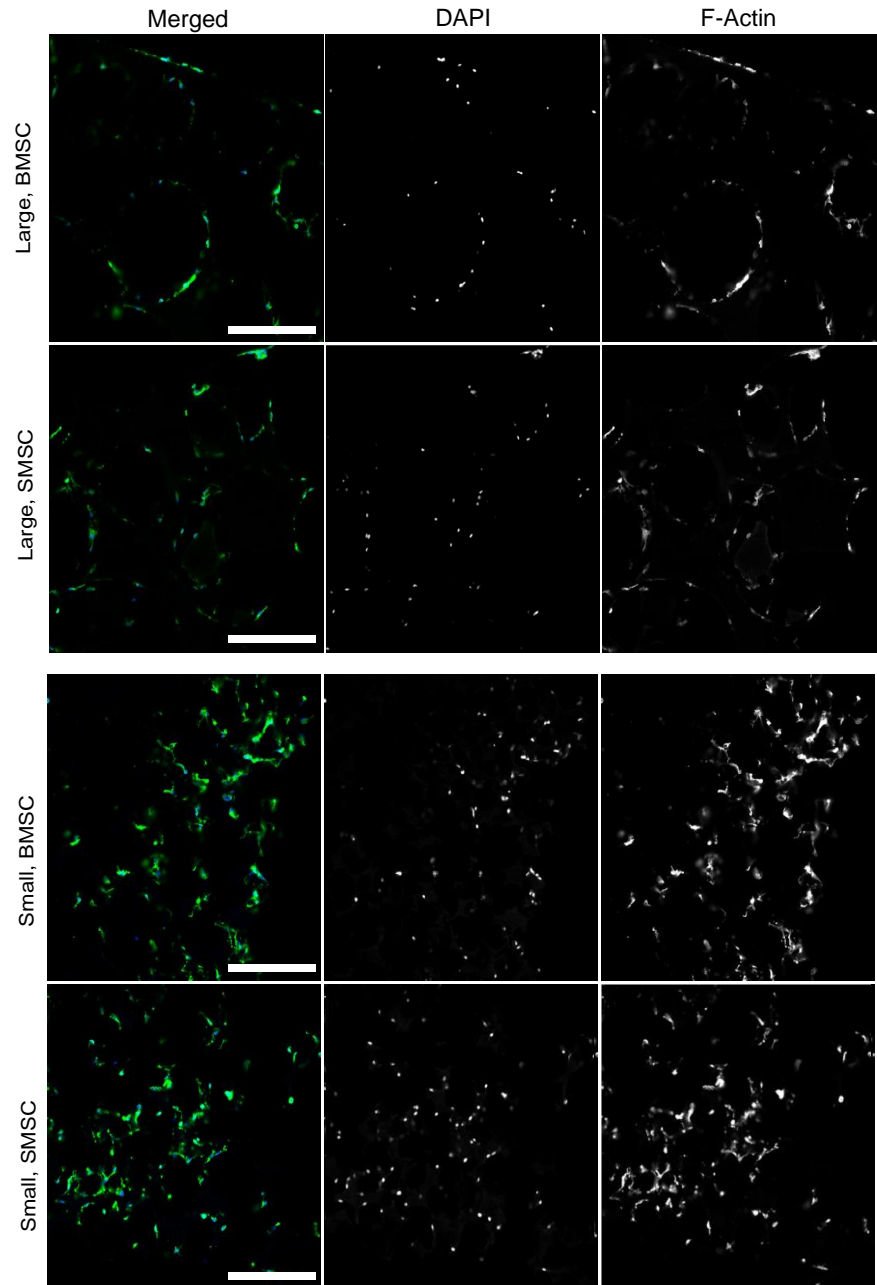

**Figure S1.** Confocal laser microscopy of cell-seeded scaffolds cultured for 1 week in vitro demonstrate uniform cell seeding density at low magnification (green: actin, blue: DAPI/nucleus; scale = 250  $\mu$ m).

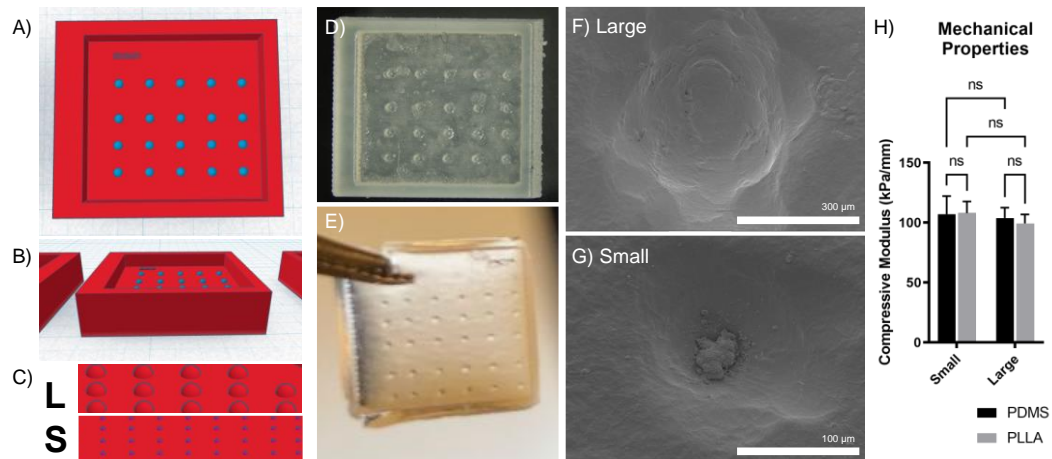

**Figure S2.** Pore hemisphere tools were designed in Tinker CAD (A–C) and 3D printed (D). Imaging tools were cast in polydimethylsiloxane (PDMS) by soft lithography and cured by heat-induced polymerization (E). The surface morphology and pore size of PDMS constructs (laden with cells) is visualized by scanning electron microscopy (F,G). PDMS synthesis was optimized to match the mechanical properties of PLLA scaffolds (H, all combinations are non-significant (n.s.)).

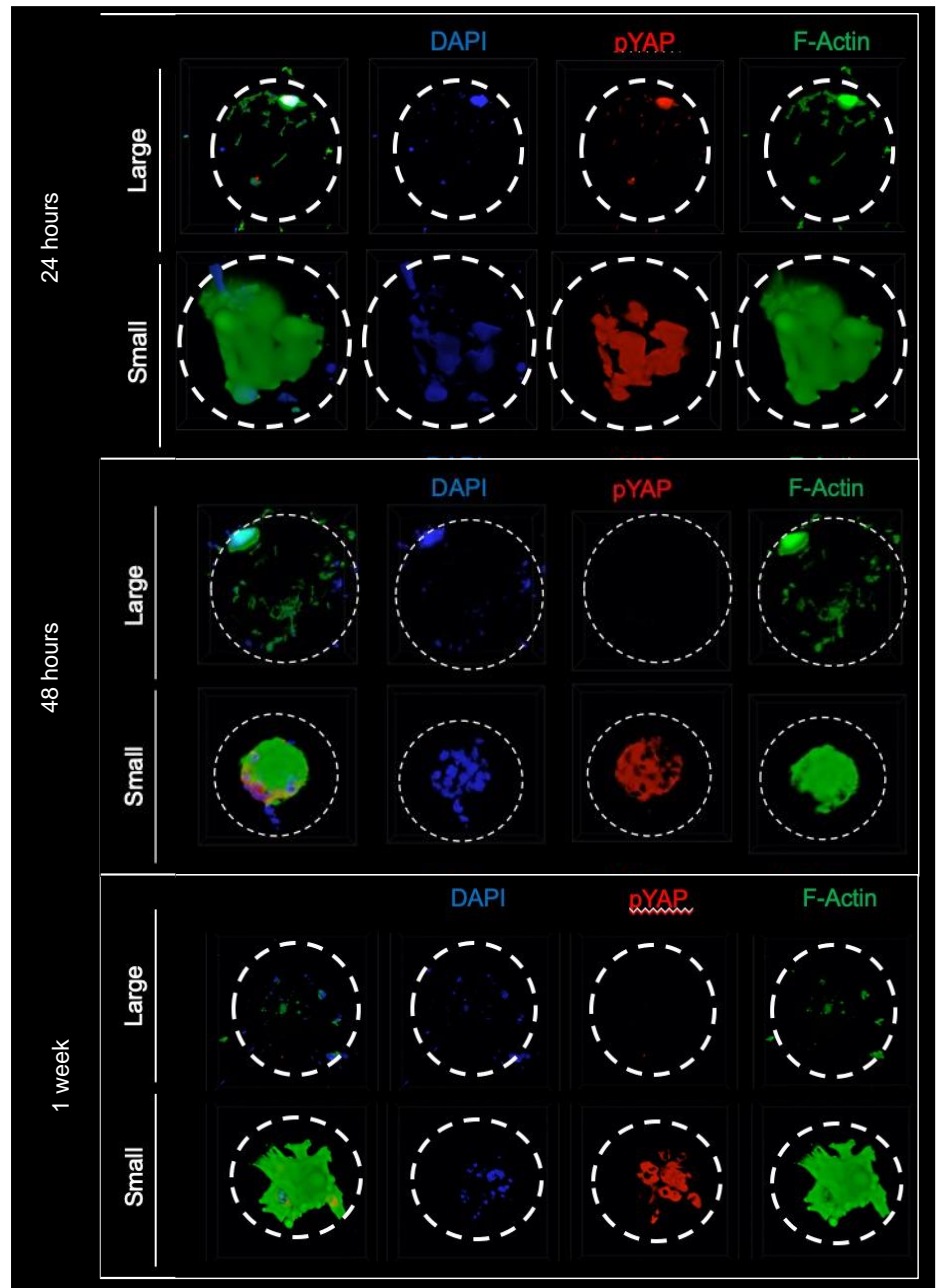

**Figure S3.** Suture mesenchymal stem cells (SMSCs) are cultured on PDMS macropore-mimetic hemispheres for up to 1 week in vitro; changes in YAP phosphorylation (red) are observed by confocal laser microscopy and immunofluorescence. Hemisphere perimeters are outlined in white.

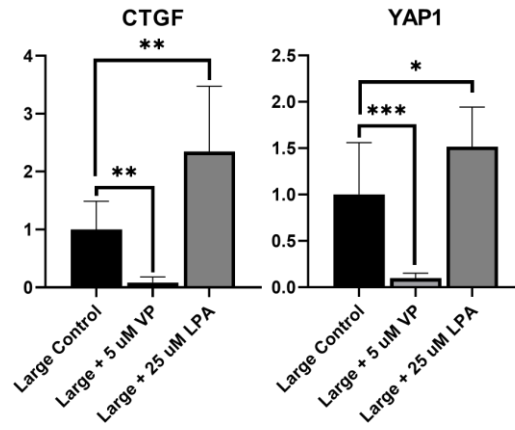

**Figure S4.** Pharmacologic administration of verteporfin (VP, 5 uM) and lysophosphatidic acid (LPA, 25 uM) inhibit and activate YAP signaling, respectively, compared to vehicle control. \* =  $p < 0.05$ , \*\* =  $p < 0.01$ , \*\*\* =  $p < 0.001$ , \*\*\*\* =  $p < 0.0001$ .
